# Supplementary material
Source: Springer Nature journal article supplement (https://www.springermedizin.de/resource/supplementary/13075_2011_3148_MOESM4_ESM.pdf/9693848)

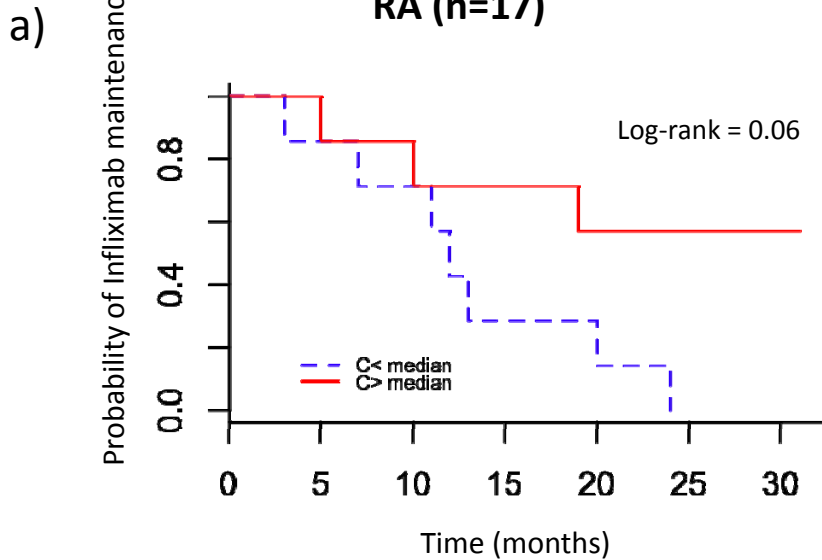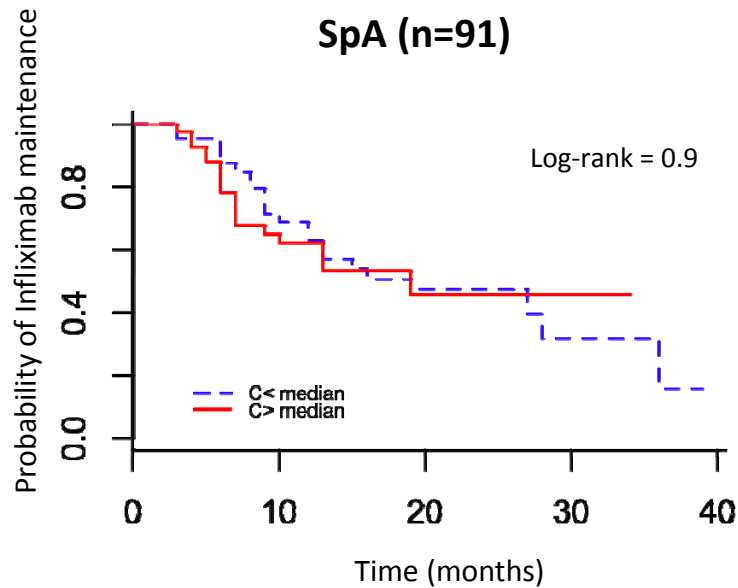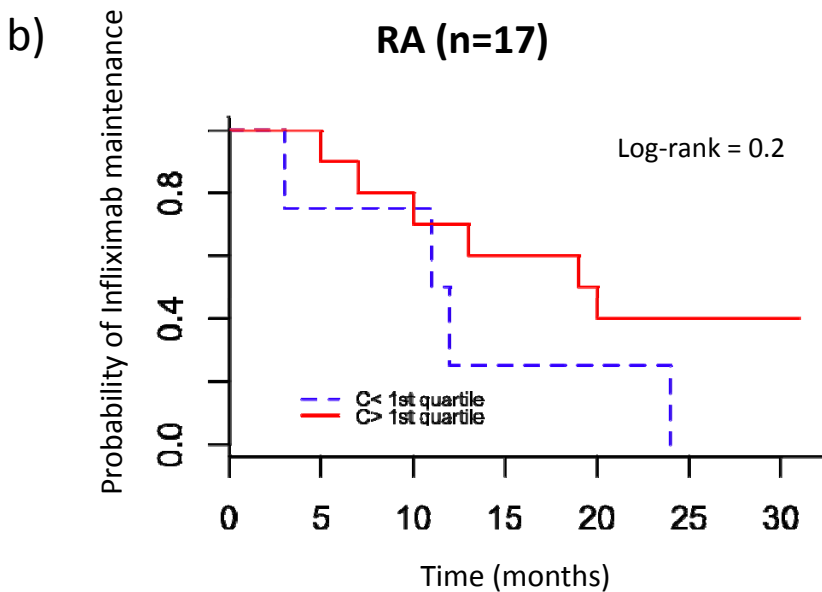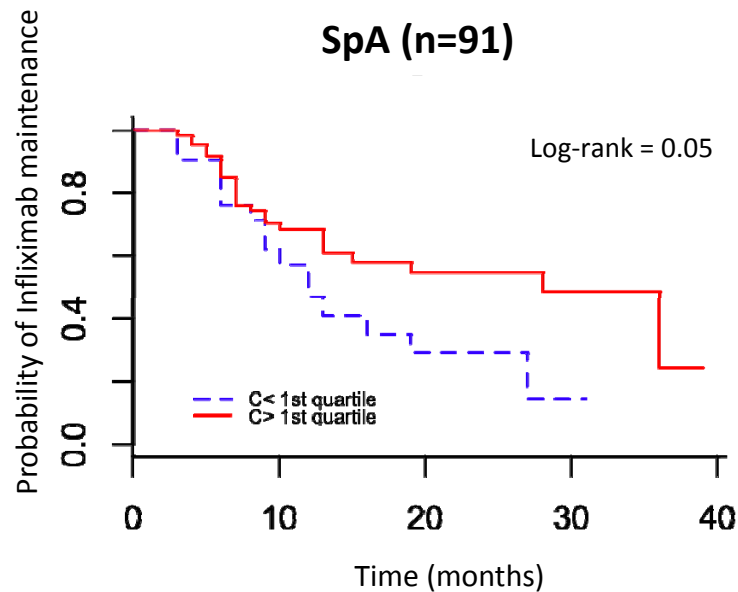

Supplement: MOESM4 [file 9693848]
